# Supplementary material
Source: PubMed Central journal article supplement (PMC3705600)
Supplement: cdd201341x3.pdf [file cdd201341x3.pdf]

## Antibodies used in the study

| Antibody             | Supplier                            |
|----------------------|-------------------------------------|
| p63 (4A4)            | Abcam, Cambridge, MA                |
| p63 $\alpha$ (H-129) | SCBT, San Diego,CA                  |
| $\Delta$ NP63        | Biologend                           |
| SUFU                 | SCBT, San Diego,CA                  |
| SUFU                 | Epitomics                           |
| mBCL-2               | BD Biosciences                      |
| $\beta$ -actin       | Sigma                               |
| $\alpha$ -tubulin    | Calbiochem                          |
| HA                   | Roche                               |
| $\Delta$ NP63        | Romano RA et al., Development 2012. |
| GAPD                 | Millipore                           |
| p63                  | SCBT, San Diego,CA                  |
| IgG Alexa 568        | Molecular Probes                    |
| IgGAlexa 488         | Molecular Probes                    |
| GLI1                 | Cell Signalling                     |
| BCL2                 | SCBT, San Diego,CA                  |
| BIM                  | BD Biosciences                      |
| BAX(N-20)            | SCBT, San Diego,CA                  |
| BAK(N-20)            | SCBT, San Diego,CA                  |
| BAD(C-7)             | SCBT, San Diego,CA                  |

All Taqman Probes from Applied Biosystems

| Human | Gene          | Probe ID         |
|-------|---------------|------------------|
|       | SUFU          | Hs_0000171981_m1 |
|       | TP63          | Hs_00978343_m1   |
|       | $\Delta$ Np63 | Hs_00978339_m1   |
|       | TAp63         | Hs_00978349_m1   |
|       | p63 $\alpha$  | Hs_00978338_m1   |
|       | BCL2          | Hs_153350_m1     |
|       | GAPD          | Hs_99999905_m1   |

| Mouse | Gene | Probe ID       |
|-------|------|----------------|
|       | GAPD | Mm_99999915_g1 |
|       | TP63 | Mm_00495788_m1 |

| siRNA | Gene       | Cat. No.       | Supplier  |
|-------|------------|----------------|-----------|
|       | TP63       | L-003330-00    | Dharmacon |
|       | SUFU       | L-015382-00    | Dharmacon |
|       | Neg. Sirna | D-001810-02-05 | Dharmacon |
|       | Neg. Sirna | SIC-001        | Sigma     |

Primers used in the study  
Human

Gene  
HPRT  
β2-Macroglobulin  
GAPD  
p63α

Sequence Fwd  
TGGTCAGGCAGTATAATCCAAGA  
TGACTTTGTCACAGCCCAAGATA  
CCCCGGCAGCACAGA  
TCCATGGATGATCTGGCAAGT

Rev  
TCAAATCCAACAAAGTCTGGCTTA  
CGGCATCTTCAAACCTCCA-  
CCACGATGGAGGGGAAGAC  
GCCCTTCCAGATCGCATGT

Reference

Rinne T et al. Human Mol Genetics 2008

Mouse

GAPD  
β2-Macroglobulin  
P63α  
PTCH  
BCL2  
GLI1  
SUFU

TCACCACATGGAGAAGCC  
AGACTGATACATACGCCTGCAG  
CAGACTTGCCAAATCATCC  
ATGGTCCTGGCTCTGATGAC  
ATGTGTGGAGAGCGTCAA  
CCCATAGGGTCTCGGGGTCTCAAAC  
ACACCCGTATGCAGCTCA

GCTAAGCAGTTGGTGGTGCA  
GCAGGTTCAAATGAATCTTCAG  
CAGCATTGTCAGTTTCTTAGC  
TAGCCCTGTGGTTCTTGTC  
CATGCTGGGGCCATATAGTT  
GGAGGACCTGCGGCTGACTGTGTAA  
GTCGGGAGAATGGACACT

Su et al Cell Stem Cell 2009 Vol 5  
King KE et al. Carcinogenesis 2006  
Stecca et al EMBO 2010  
Stecca et al EMBO 2010  
Jaks V et al. Nature Genet 2008

GLI EMSA Primers

Bigelow et al 2004 JBC
