# Supplementary material
Source: PubMed Central journal article supplement (PMC3705600)

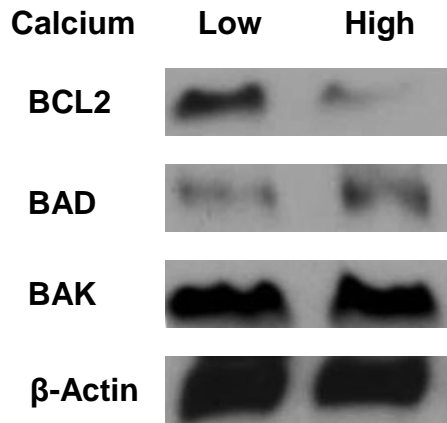

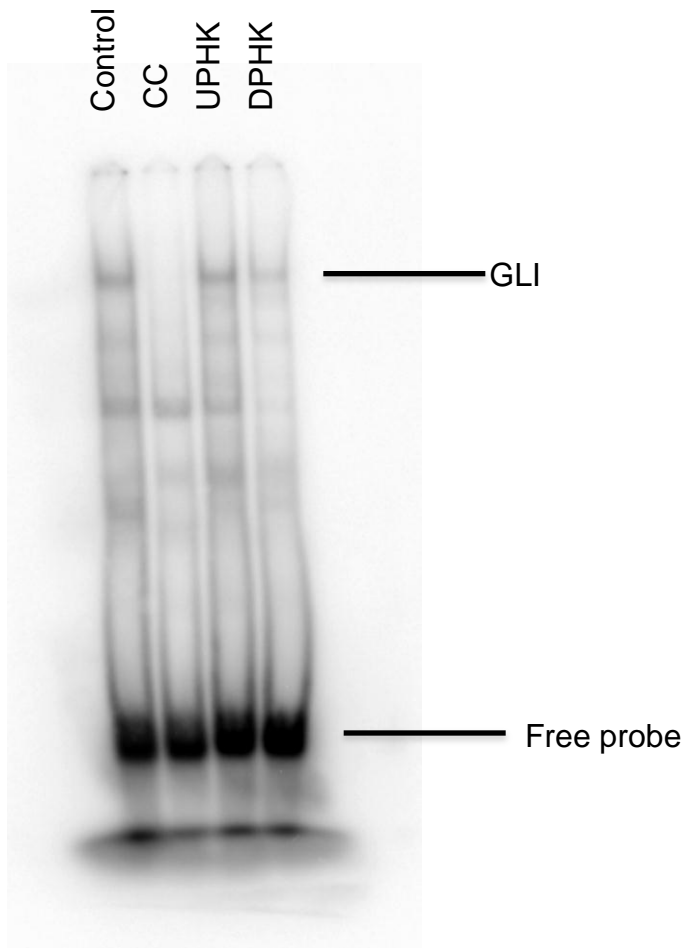

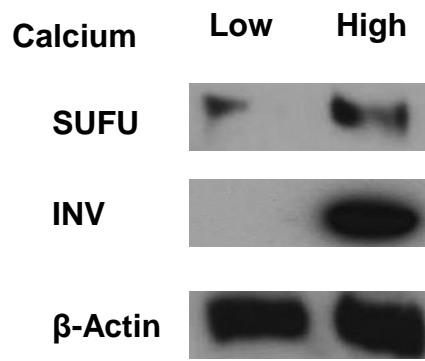

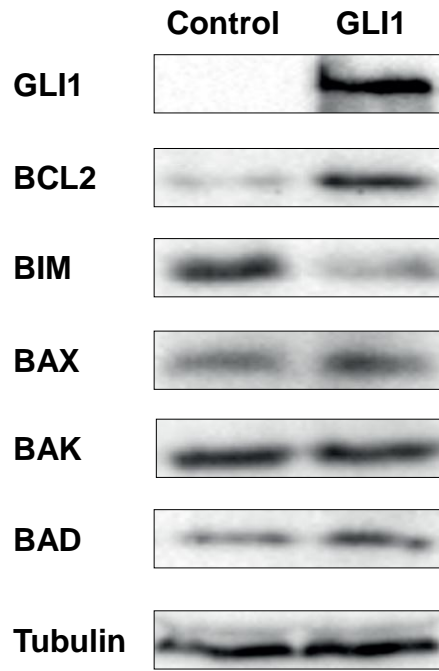

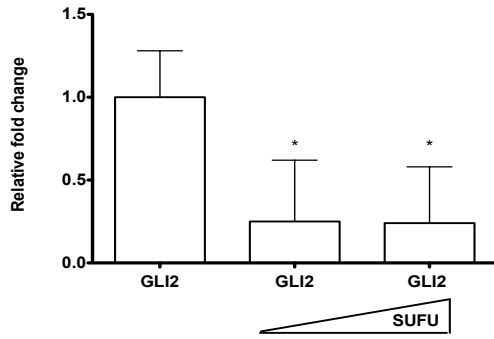

a

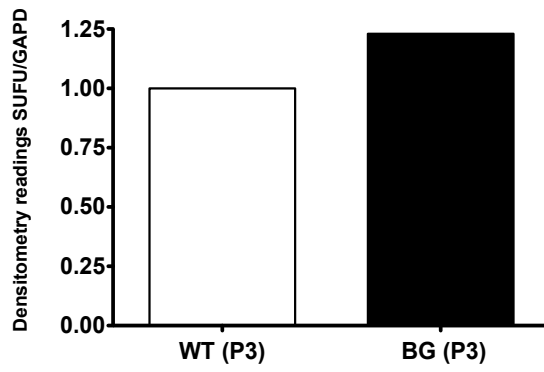

b

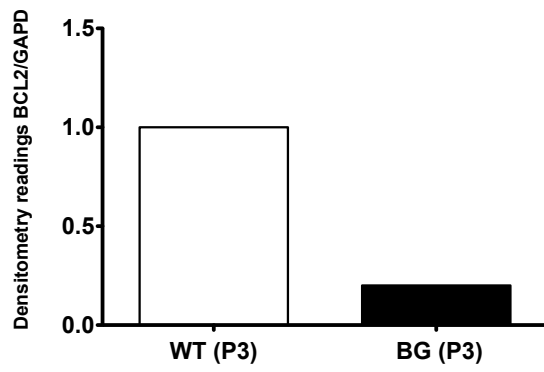

Supplement: cdd201341x1.pdf [file cdd201341x1.pdf]
